# Supplementary material for: Complex genetic patterns in closely related colonizing invasive species
Source: PubMed Central journal article supplement (PMC3434944; doi:10.1002/ece3.258), 2012-07

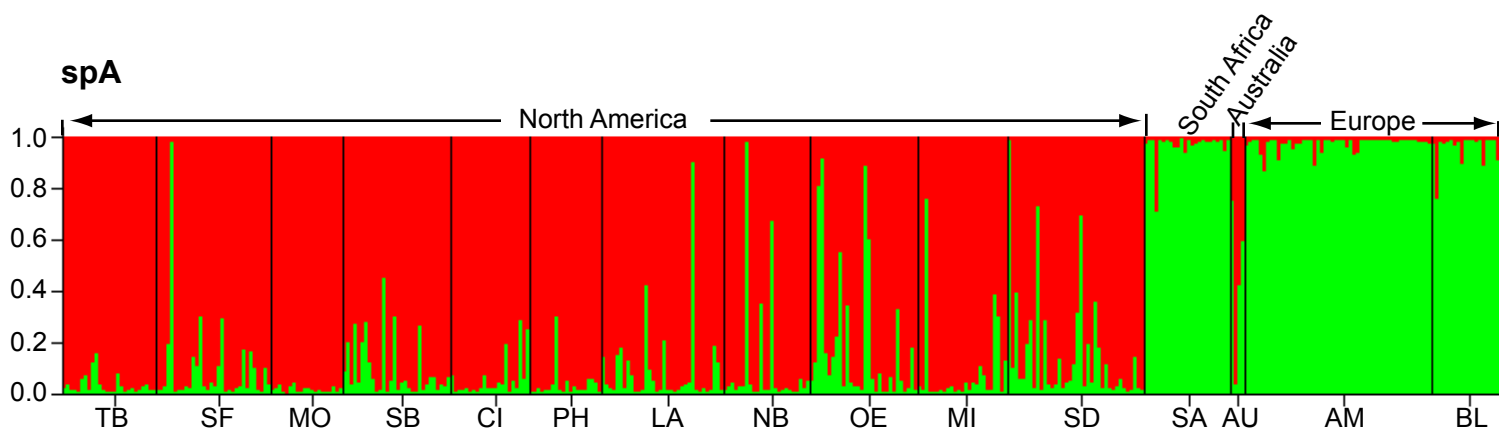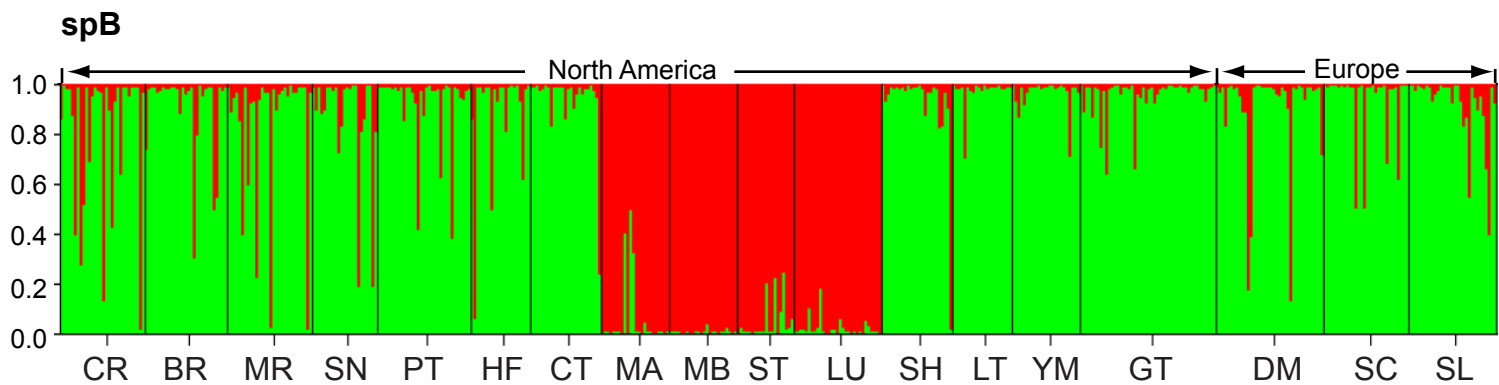

Supplement: ece30002-1331-SD2.pdf [file ece30002-1331-SD2.pdf]
